# Supplementary material for: Metabolome-wide association of carotid intima media thickness identifies FDX1 as a determinant of cholesterol metabolism and cardiovascular risk in Asian populations
Source: bioRxiv or medRxiv preprint supplement (doi:10.1101/2024.05.14.24307316), 2024-05-24
Supplement: Supplementary file [file media-1.pdf]

## Supplementary Information

### Metabolome-wide association of carotid intima media thickness in an Asian population cohort identifies FDX1 as a novel determinant of cholesterol metabolism and cardiovascular risk.

Nilanjana Sadhu<sup>1\*</sup>, Rinkoo Dalan<sup>1,2</sup>, Pritesh R Jain<sup>1</sup>, Chang Jie Mick Lee<sup>3,4</sup>, Leroy Sivappiragasam Pakkiri<sup>5</sup>, Kai Yi Tay<sup>1</sup>, Theresia H Mina<sup>1</sup>, Dorrain Low<sup>1</sup>, Yilin Min<sup>6</sup>, Matthew Ackers-Johnson<sup>3,4</sup>, Thi Tun Thi<sup>6</sup>, Vishnu Goutham Kota<sup>7</sup>, Yu Shi<sup>6</sup>, Yan Liu<sup>6</sup>, Henry Yu<sup>7</sup>, Darwin Tay<sup>1</sup>, Hong Kiat Ng<sup>1</sup>, Xiaoyan Wang<sup>1</sup>, Kari E Wong<sup>8</sup>, Max Lam<sup>1,9</sup>, Xue Li Guan<sup>1</sup>, Nicolas Bertin<sup>10</sup>, Eleanor Wong<sup>10</sup>, James Best<sup>1</sup>, Rangaprasad Sarangarajan<sup>8</sup>, Paul Elliott<sup>1,11</sup>, Elio Riboli<sup>1,11</sup>, Jimmy Lee<sup>1,9</sup>, Eng Sing Lee<sup>1,12</sup>, Joanne Ngeow<sup>1,13</sup>, Patrick Tan<sup>10,14</sup>, Christine Cheung<sup>1,15</sup>, Chester Lee Drum<sup>5</sup>, Roger SY Foo<sup>3,4,7</sup>, Gregory A Michelotti<sup>8</sup>, Haojie Yu<sup>4,6</sup>, Patricia A Sheridan<sup>8</sup>, Marie Loh<sup>1,11,16</sup>, and John C Chambers<sup>1,11,14\*</sup>

<sup>1</sup>Lee Kong Chian School of Medicine, Nanyang Technological University, Singapore

<sup>2</sup>Department of Endocrinology, Tan Tock Seng Hospital, Singapore

<sup>3</sup>Cardiovascular Research Institute, National University Health System, Singapore

<sup>4</sup>Cardiovascular Metabolic Disease Translational Research Programme, Yong Loo Lin School of Medicine, National University of Singapore, Singapore

<sup>5</sup>Department of Medicine, Yong Loo Lin School of Medicine, National University of Singapore, Singapore

<sup>6</sup> Precision Medicine Translational Research Programme, and Department of Biochemistry, Yong Loo Lin School of Medicine, National University of Singapore, Singapore

<sup>7</sup>Department of Physiology, Yong Loo Lin School of Medicine, National University of Singapore, Singapore

<sup>8</sup>Metabolon, Inc., Durham, North Carolina, USA

<sup>9</sup>North Region, Institute of Mental Health, Singapore

<sup>10</sup>Genome Institute of Singapore, Agency for Science, Technology and Research, Singapore

<sup>11</sup>Department of Epidemiology and Biostatistics, Imperial College London, London, UK

<sup>12</sup>Clinical Research Unit, National Healthcare Group Polyclinic, Singapore

<sup>13</sup>Cancer Genetics Service, National Cancer Centre, Singapore

<sup>14</sup>Precision Health Research, Singapore, Singapore

<sup>15</sup>Institute of Molecular and Cell Biology, Agency for Science, Technology and Research, Singapore

<sup>16</sup>National Skin Centre, Singapore

#### \*Corresponding authors:

Nilanjana Sadhu ([nilanjana.sadhu@ntu.edu.sg](mailto:nilanjana.sadhu@ntu.edu.sg)),

John C Chambers ([john.chambers@ntu.edu.sg](mailto:john.chambers@ntu.edu.sg))

## **Description of tables in file “Supplementary Tables.xlsx”**

**Supplementary Table 1. Cohort Characteristics.**

**Supplementary Table 2. Quality control of metabolite and research phenotype data**

**Supplementary Table 3: Descriptive statistics for distribution of 883 metabolites in the overall dataset (N=8124) and stratified by ethnicity (Chinese N=5428, Indian N=1552, Malay N=1144).**

Kruskal-Wallis (KW) and Anova tests were performed to test for differences in distribution of log-transformed metabolite abundances across the three ethnic groups.

**Supplementary Table 4: Summary statistics for association analysis of 883 metabolites with mean cIMT in the overall dataset and stratified by ethnicity.**

Overall analysis was adjusted for age, sex, ethnicity, and batch (Model 1). Ethnicity-specific analysis was adjusted for age, sex, and batch.

**Supplementary Table 5: Summary statistics for 252 metabolites significantly associated with mean cIMT.**

Model 1 was adjusted for age, sex, ethnicity, and batch (N=8124). Model 2 was adjusted for age, sex, ethnicity, batch, and traditional vascular risk factors: BMI, systolic BP, total cholesterol, T2D status, smoking status (N=8056). Model 3 was conducted in a subset of the cohort not on cholesterol-lowering drugs and adjusted for age, sex, ethnicity, batch, and traditional risk factors: BMI, systolic BP, total cholesterol, T2D status, smoking status (N=6689).

**Supplementary Table 6: Summary statistics from GSMR of 126 metabolites (exposures, HELIOS study) against CAD (outcome; Koyama et al. 2020).**

**Supplementary Table 7: Summary statistics from GSMR of 126 metabolites (exposures, HELIOS study) against mean cIMT (outcome; Yeung et al. 2022).**

**Supplementary Table 8: Summary of results from TwoSampleMR.**

**Supplementary Table 9. Functional annotation of 1,259 candidate variants in the risk loci.**

RegulomeDB score is a categorical score ranging from 1a to 7, indicating the following: 1a, eQTL + transcription factor (TF) binding + matched TF motif + matched DNase footprint + DNase peak; 1b, eQTL + TF binding + any motif + DNase footprint + DNase peak; 1c, eQTL + TF binding + matched TF motif + DNase peak; 1d, eQTL + TF binding + any motif + DNase peak; 1e, eQTL + TF binding + matched TF motif; 1f, eQTL + TF binding/DNase peak; 2a, TF binding + matched TF motif + matched DNase footprint + DNase peak; 2b, TF binding + any motif + DNase footprint + DNase peak; 2c, TF binding + matched TF motif + DNase peak; 3a, TF binding + any motif + DNase peak; 3b, TF binding + matched TF motif; 4, TF binding + DNase peak; 5, TF binding or DNase peak; 6, other; 7, not available.

**Supplementary Table 10: Summary statistic of rs10488763 PheWAS against 168 NMR-based metabolites in Europeans and Asians.**

**Supplementary Table 11: Summary statistics from SMR analysis of metabolite 3BH5C GWAS in HELIOS and Whole Blood cis-eQTLs from GTEx V8 (results from chromosome 11)**

**Supplementary Table 12: Correlation of metabolite 3BH5C with other metabolites adjusted age, sex, ethnicity (results for correlations with Bonferroni-corrected P-value < 0.05 & absolute coefficient values greater than 0.2).**

## Supplementary Figures

Supplementary Figure 1. Distribution of mean cIMT in the study population (N=8,124).

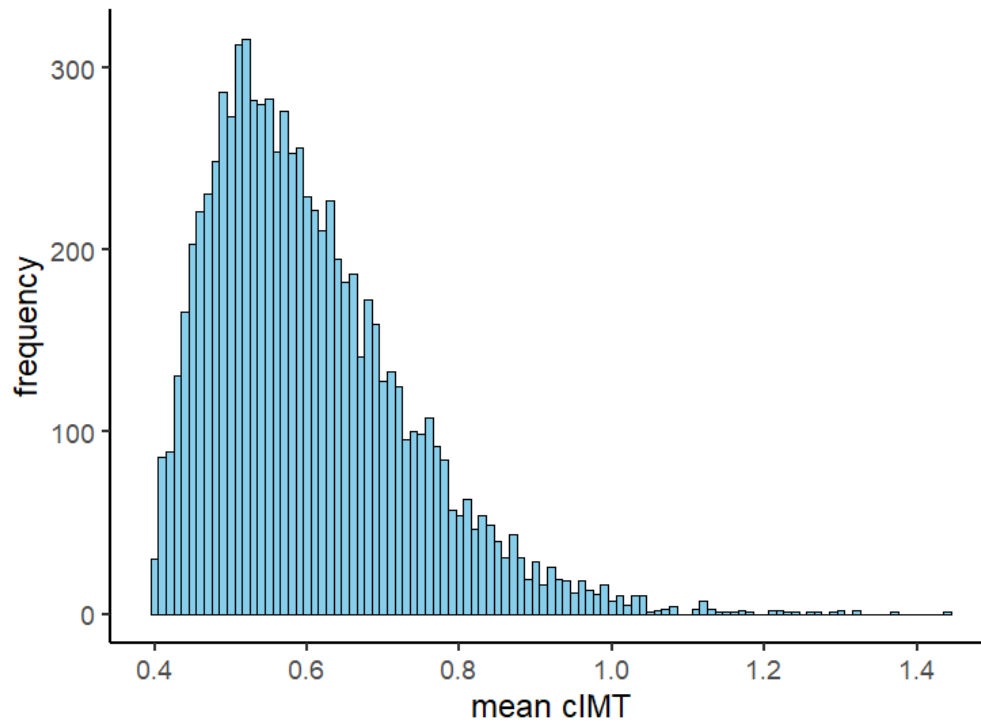

**Supplementary Figure 2. Distribution of quantified metabolites across different metabolite categories.**

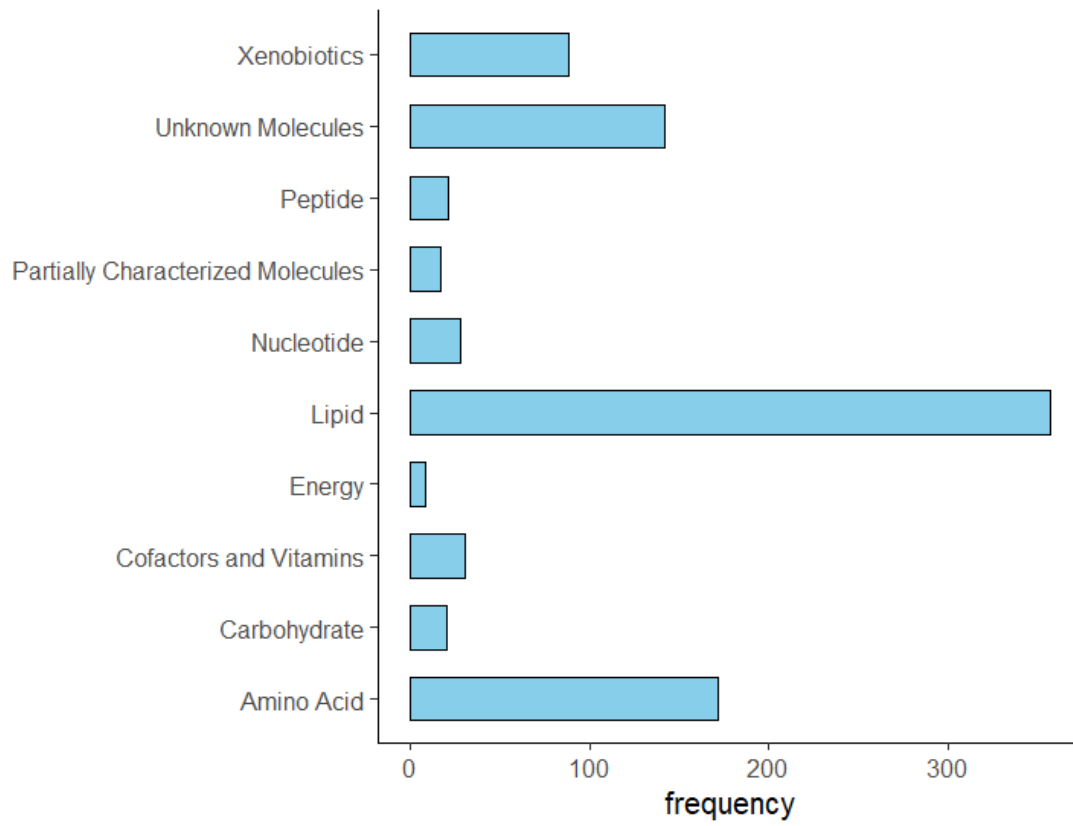

**Supplementary Figure 3. MR estimates from inverse variance weighted leave-one-out sensitivity analysis of 3BH5C (exposure) on CAD (outcome).**

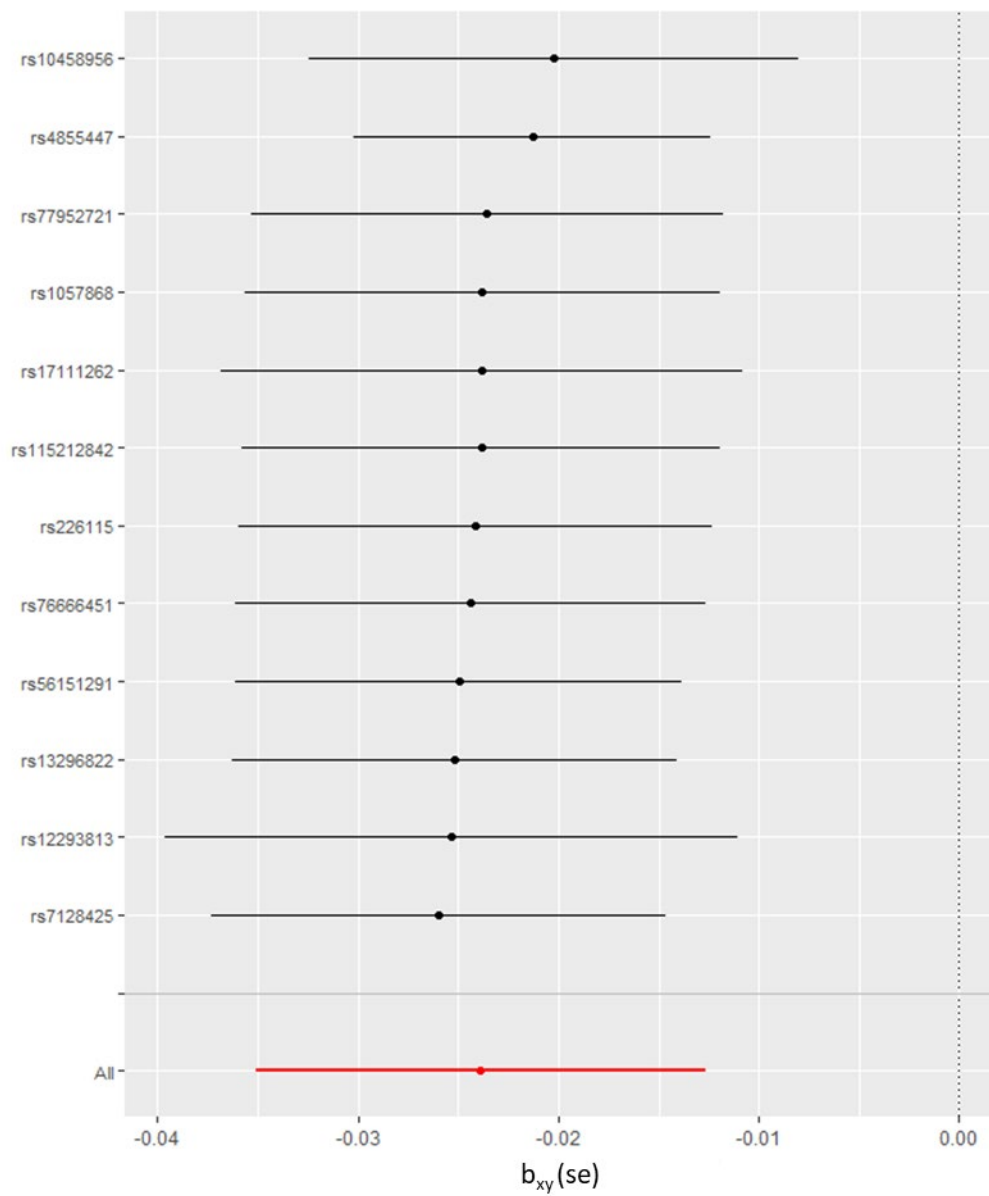

Supplementary Figure 4. (a) Manhattan plot and (b) QQ plot of GWAS of 3BH5C in the HELIOS cohort (N=1,876;  $\lambda_{GC}=1.002$ ).

a.

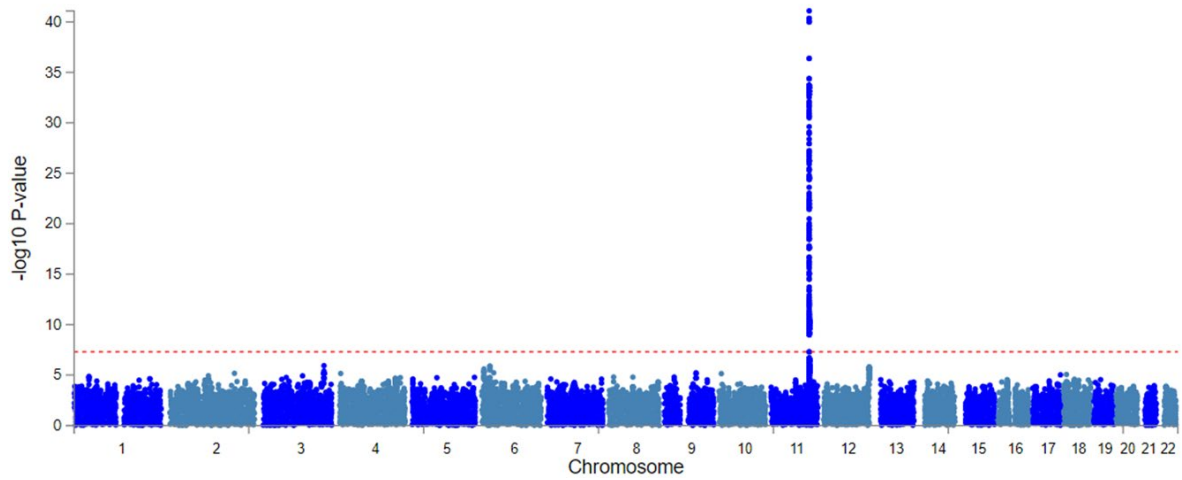

b.

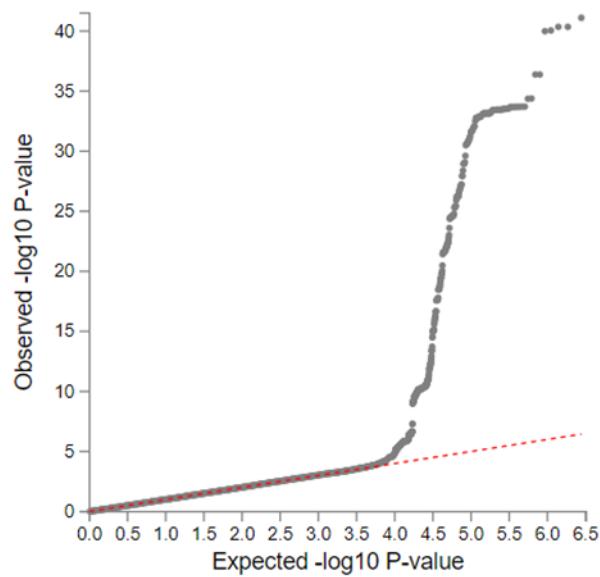

In panel (a), Manhattan plot x-axis is displaying position of genetic variants on chromosome (hg38), and y-axis is displaying the strength of association of genetic variants with mean-cIMT. Horizontal red line indicates a GWAS threshold of  $P=5 \times 10^{-8}$ . The top variant is rs2051466 ( $P = 7.9 \times 10^{-43}$ ).

**Figure 5. Bar plots showing correlation coefficient estimates of metabolite 3BH5C with (a) traditional vascular risk factors (Bonferroni-corrected P-value < 0.05). and (b) other metabolites (Bonferroni-corrected P-value < 0.05 and absolute correlation coefficients > 0.2), adjusted for age, sex, and ethnicity.**

**a.**

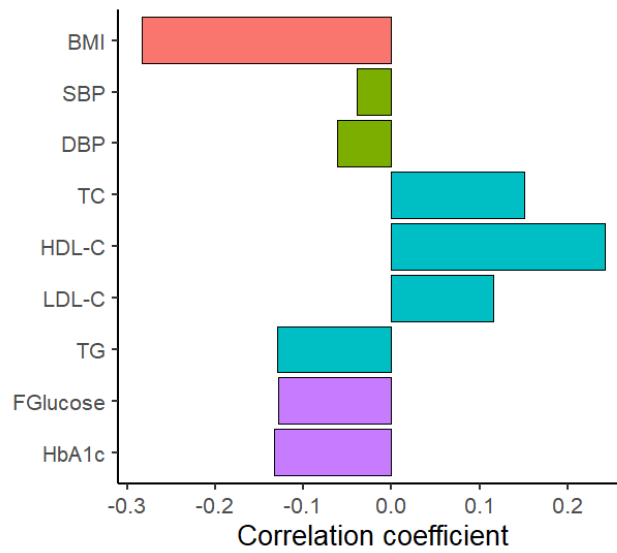



b.

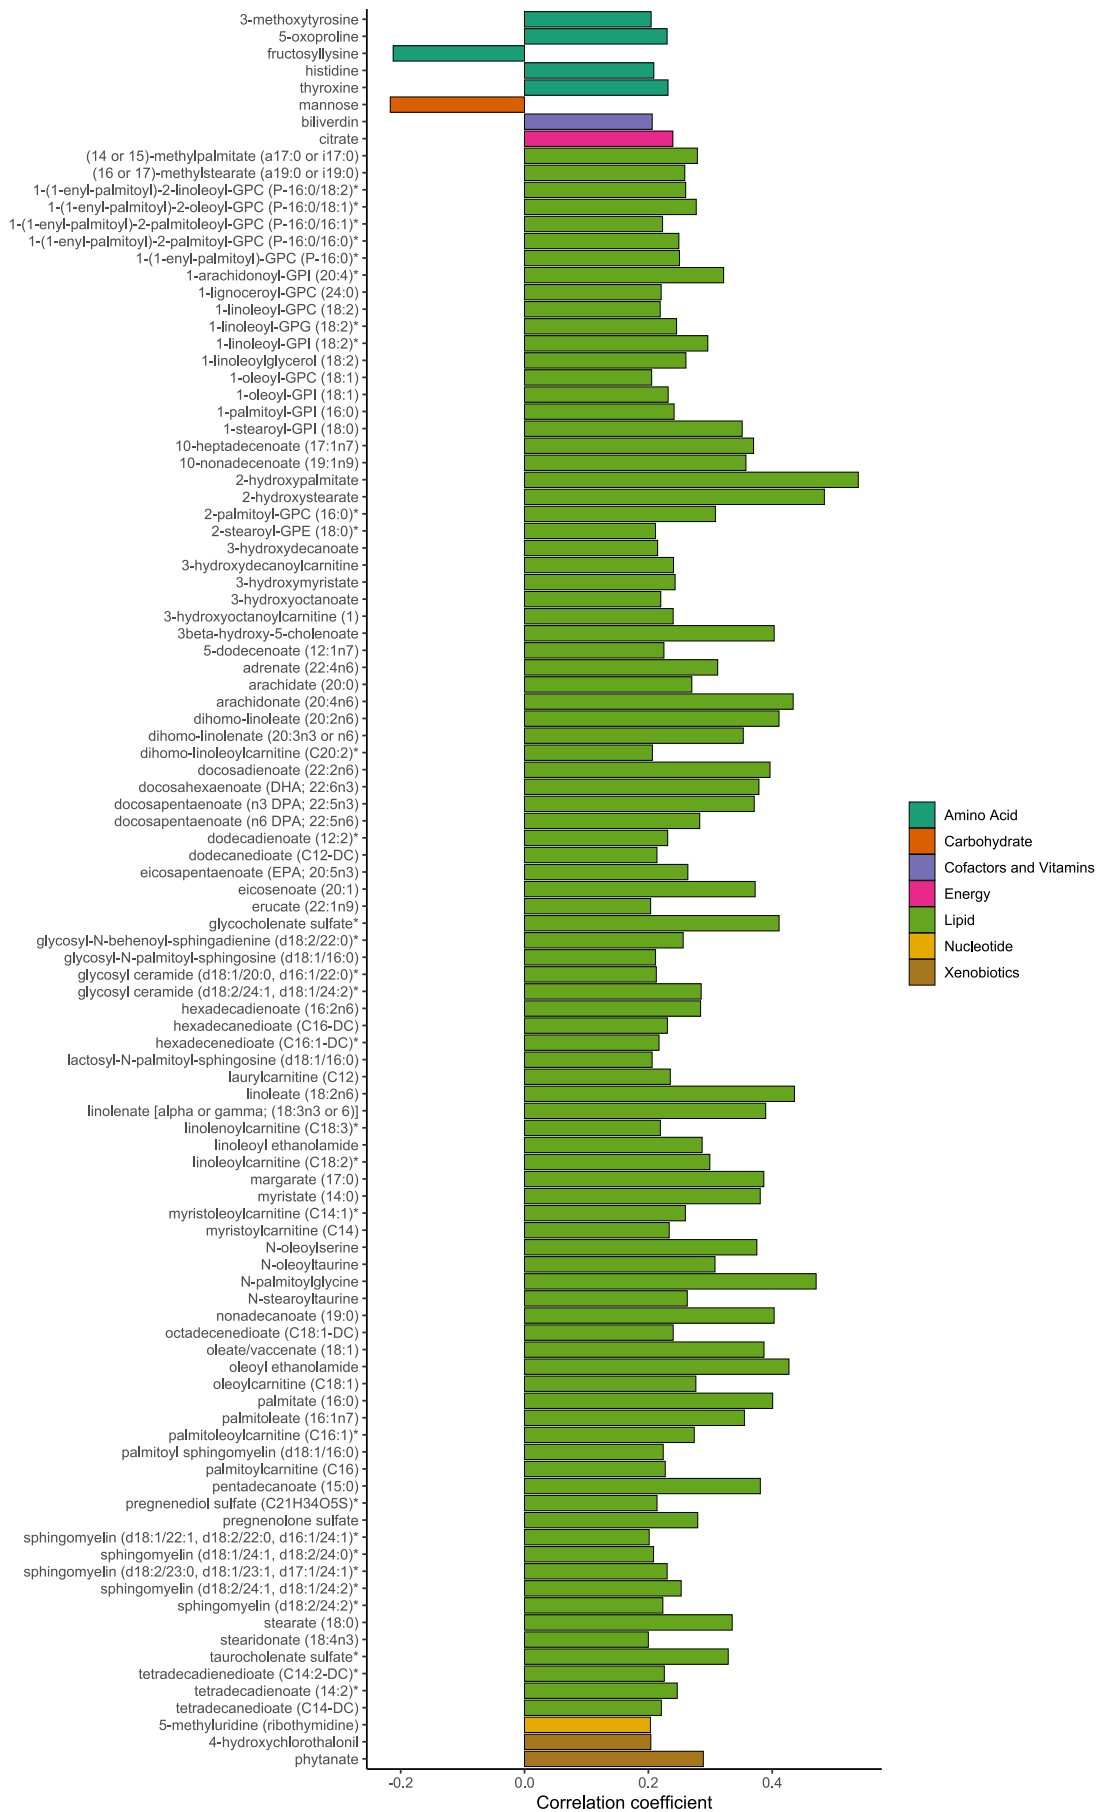

In panel (a), bars are coloured by risk factors that include (1) BMI: Body Mass Index [red], (2) DBP: Diastolic Blood Pressure [green], (3) SBP: Systolic Blood Pressure [green], (4) TC: Total Cholesterol [blue], (5) HDL-C: High Density Lipoprotein Cholesterol [blue], (6) LDL-C: Low Density Lipoprotein Cholesterol [blue], (7) TG: Triglyceride [blue], (8) HbA1C: Glycated hemoglobin [purple], (9) FGlucose: fasting plasma glucose [purple]. For all correlations, Bonferroni-corrected P-value < 0.05.

In panel (b), bars are coloured by the metabolite category indicated in the figure legend. This panel shows metabolites with Bonferroni-corrected P-value < 0.05 & absolute coefficient values greater than 0.2.

**Figure 6. Volcano plot showing phenome-wide association of rs10488763 in the Biobank Japan Project.**

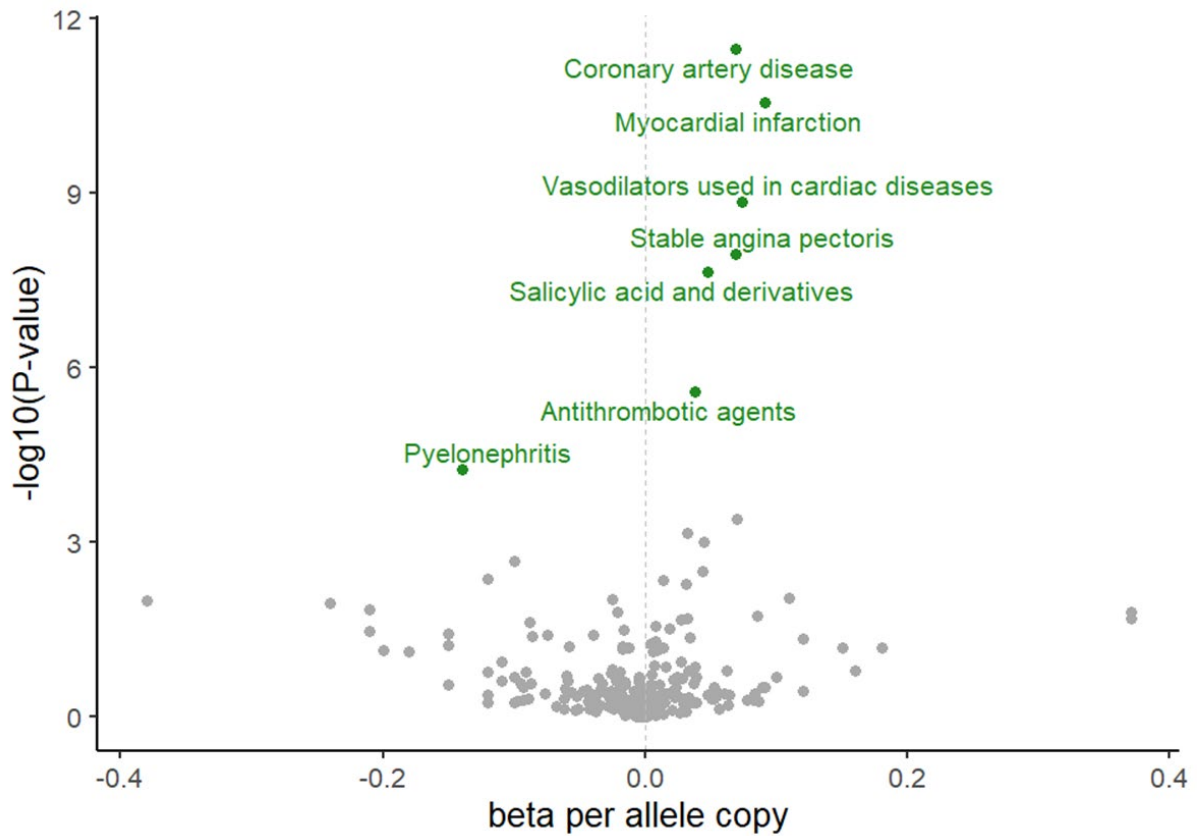

Volcano plot is displaying the association of rs10488763 effect allele T with 259 traits listed in the Biobank Japan PheWeb (<https://pheweb.jp/>). Vertical grey line indicates no effect. Associations highlighted in green are significant at a P-value threshold of  $P=2 \times 10^{-4}$  after correcting for 259 tests.

**Figure 7. Construction of H1-hESC derived cell-lines.**

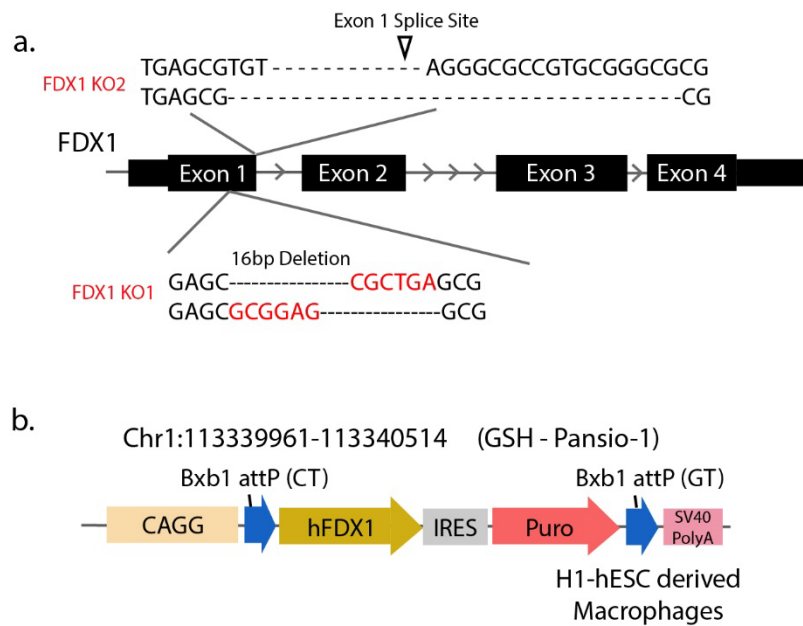

(a) Sequencing validation with two independent FDX1 knock-out (KO) human Embryonic Stem Cell (hESC) clones using two independent sgRNAs targeting Exon 1 splice junction, and a 16-bp deletion on Exon 1 respectively. (b) Schematic illustration of the human FDX1 transgene payload, over-expression (OE) and rescue by knocking into the safe-harbour Pansio-1 locus in H1-hESC's Pansio-1 Safe Harbour line.
